# Supplementary material
Source: PubMed Central journal article supplement (PMC6530911)
Supplement: NIHMS1028872-supplement-1.pdf [file NIHMS1028872-supplement-1.pdf]

**Supplementary Table 1. Prognostic value of MCL35 score (low – standard - high), MIPI and Ki67 score for overall and progression free survival.**

| type       | variable                   | OS     |        |            |            | PFS    |        |            |            |
|------------|----------------------------|--------|--------|------------|------------|--------|--------|------------|------------|
|            |                            | Pval   | HR     | HR.LowerCL | HR.UpperCL | Pval   | HR     | HR.LowerCL | HR.UpperCL |
| Unadjusted | MCL35 score (LOW vs STAN)  | 0.70   | 1.2534 | 0.4018     | 3.9106     | 0.31   | 1.6316 | 0.6396     | 4.1623     |
|            | MCL35 score (HIGH vs STAN) | 0.0147 | 3.5720 | 1.2847     | 9.9317     | 0.0066 | 3.5088 | 1.4187     | 8.6781     |
| Adjusted   | MCL35 score (LOW vs STAN)  | 0.29   | 1.9603 | 0.5642     | 6.8109     | 0.11   | 2.3263 | 0.8348     | 6.4824     |
|            | MCL35 score (HIGH vs STAN) | 0.0052 | 4.8434 | 1.6017     | 14.6458    | 0.0018 | 4.8842 | 1.8084     | 13.1914    |
|            | MIPI score (+1)            | 0.0005 | 2.7108 | 1.5487     | 4.7451     | 0.0011 | 2.5545 | 1.4527     | 4.4920     |
| Adjusted   | MCL35 score (LOW vs STAN)  | 0.38   | 1.6926 | 0.5218     | 5.4902     | 0.12   | 2.1552 | 0.8147     | 5.7012     |
|            | MCL35 score (HIGH vs STAN) | 0.66   | 1.3310 | 0.3738     | 4.7397     | 0.71   | 1.2525 | 0.3900     | 4.0222     |
|            | Ki67 index (+5%)           | 0.0053 | 1.1984 | 1.0554     | 1.3609     | 0.0055 | 1.1875 | 1.0519     | 1.3406     |
| Adjusted   | MCL35 score (LOW vs STAN)  | 0.20   | 2.2885 | 0.6595     | 7.9417     | 0.0501 | 2.8300 | 0.9996     | 8.0121     |
|            | MCL35 score (HIGH vs STAN) | 0.32   | 1.9730 | 0.5164     | 7.5386     | 0.27   | 2.0036 | 0.5876     | 6.8317     |
|            | Ki67 index (+5%)           | 0.0268 | 1.1536 | 1.0166     | 1.3091     | 0.0187 | 1.1502 | 1.0236     | 1.2926     |
|            | MIPI score (+1)            | 0.0037 | 2.4504 | 1.3378     | 4.4886     | 0.0050 | 2.4034 | 1.3022     | 4.4355     |
| Adjusted   | MCL35 score (LOW vs STAN)  | 0.38   | 1.7064 | 0.5166     | 5.6360     | 0.17   | 2.0067 | 0.7463     | 5.3956     |
|            | MCL35 score (HIGH vs STAN) | 0.0578 | 2.7720 | 0.9670     | 7.9463     | 0.0445 | 2.6728 | 1.0243     | 6.9744     |
|            | Ki67 index (>=30%)         | 0.0613 | 2.6734 | 0.9546     | 7.4867     | 0.16   | 1.9464 | 0.7765     | 4.8792     |
| Adjusted   | MCL35 score (LOW vs STAN)  | 0.14   | 2.5831 | 0.7301     | 9.1391     | 0.0469 | 2.9838 | 1.0153     | 8.7692     |
|            | MCL35 score (HIGH vs STAN) | 0.0387 | 3.2967 | 1.0640     | 10.2142    | 0.0157 | 3.5652 | 1.2710     | 10.0007    |
|            | Ki67 index (>=30%)         | 0.0558 | 2.9042 | 0.9740     | 8.6601     | 0.11   | 2.1585 | 0.8356     | 5.5754     |
|            | MIPI score (+1)            | 0.0005 | 2.8857 | 1.5936     | 5.2255     | 0.0009 | 2.7617 | 1.5136     | 5.0390     |

**Supplementary Table 2. Prognostic value of MCL35 score combined with MIPI, Ki-67 and MIPI-C score for overall and progression free survival.**

| type       | variable           | OS     |         |              |             | PFS    |         |             |             |
|------------|--------------------|--------|---------|--------------|-------------|--------|---------|-------------|-------------|
|            |                    | Pval   | HR      | .HR.Lower CL | HR.Upper CL | Pval   | HR      | HR.Lower CL | HR.Upper CL |
| Unadjusted | MCL35+MIPI         | 0.0000 | 11.0278 | 3.5484       | 34.2722     | 0.0000 | 16.9725 | 5.8657      | 49.1101     |
| Adjusted   | MCL35+MIPI         | 0.0690 | 3.6576  | 0.9038       | 14.8023     | 0.0029 | 7.8469  | 2.0219      | 30.4539     |
|            | Ki67 index (+5%)   | 0.0192 | 1.1383  | 1.0213       | 1.2686      | 0.0944 | 1.0860  | 0.9859      | 1.1962      |
| Adjusted   | MCL35+MIPI         | 0.0011 | 7.3191  | 2.2153       | 24.1817     | 0.0000 | 13.2223 | 4.2551      | 41.0871     |
|            | Ki67 index (>=30%) | 0.0916 | 2.3026  | 0.8739       | 6.0672      | 0.27   | 1.5719  | 0.7058      | 3.5009      |
| Unadjusted | MCL35+MIPI-C       | 0.0000 | 7.8980  | 3.1544       | 19.7753     | 0.0000 | 6.0197  | 2.7294      | 13.2766     |
