# Supplementary material
Source: PubMed Central journal article supplement (PMC6530911)

Figure S1.

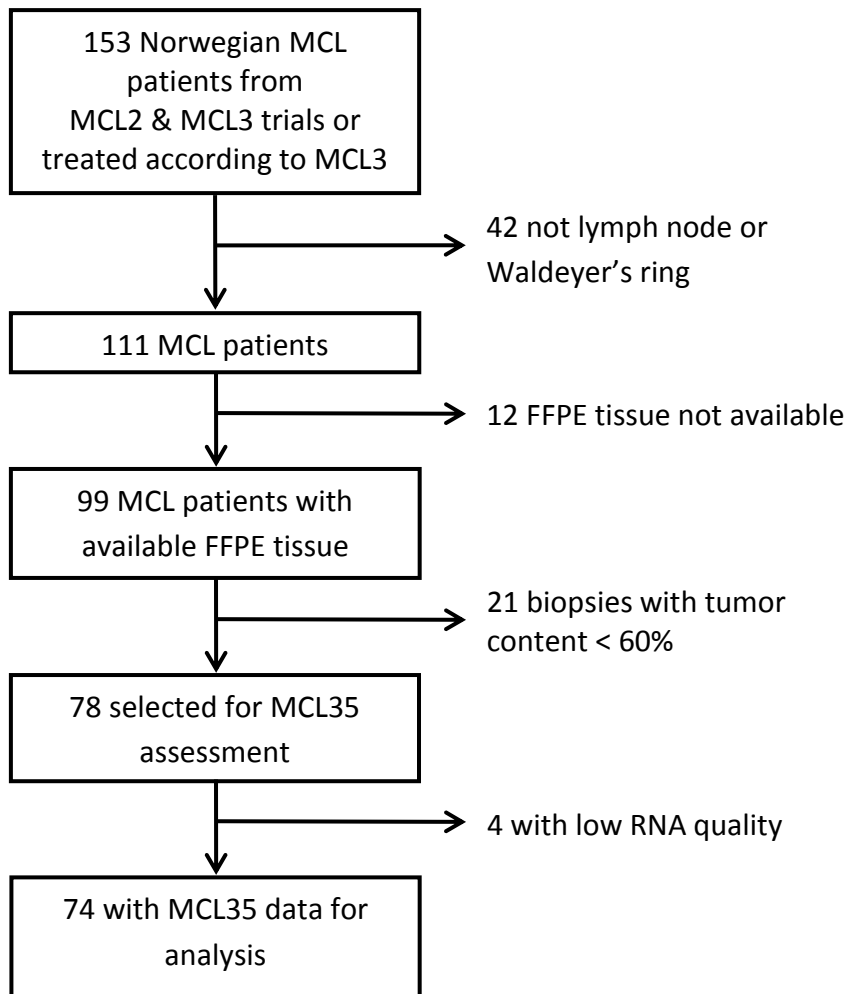

Supplement: NIHMS1028872-supplement-Figure_S1.pdf [file NIHMS1028872-supplement-Figure_S1.pdf]
